# Supplementary material for: TIGIT modulates sepsis-induced immune dysregulation in mice with preexisting malignancy
Source: JCI journal article supplement (doi:10.1172/jci.insight.139823), 2021-06-08
Supplement: sd1 [file 1]

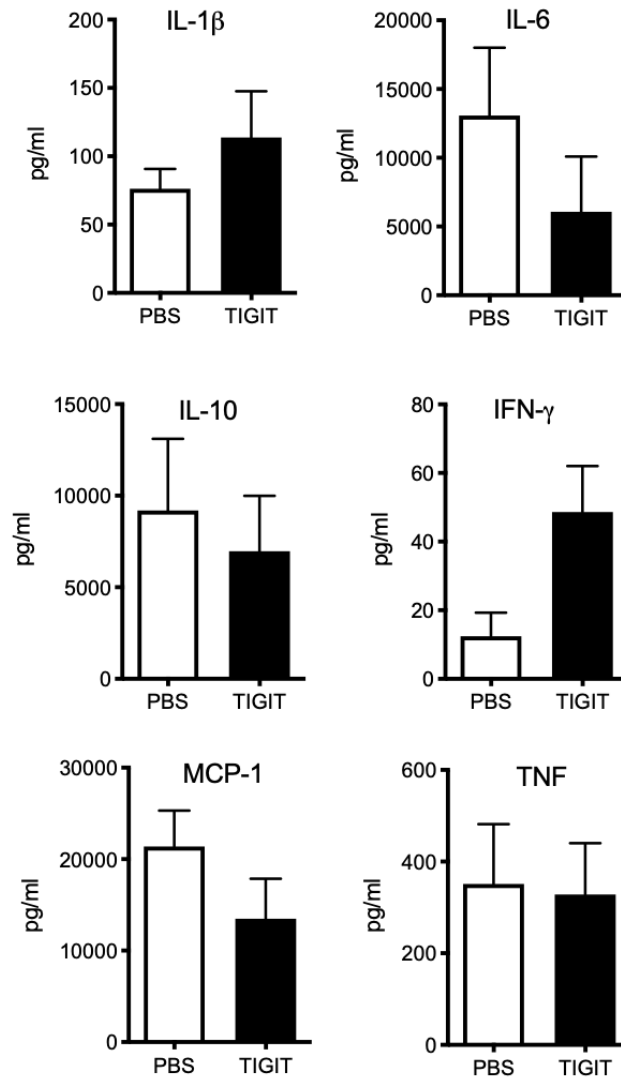

**Figure S1. Anti-TIGIT treatment does not alter serum cytokines in cancer septic hosts.**

Cancer mice were subjected to CLP and treated with anti-TIGIT mAb or PBS. Serum was collected at 48h post CLP and analyzed for the cytokines shown above.

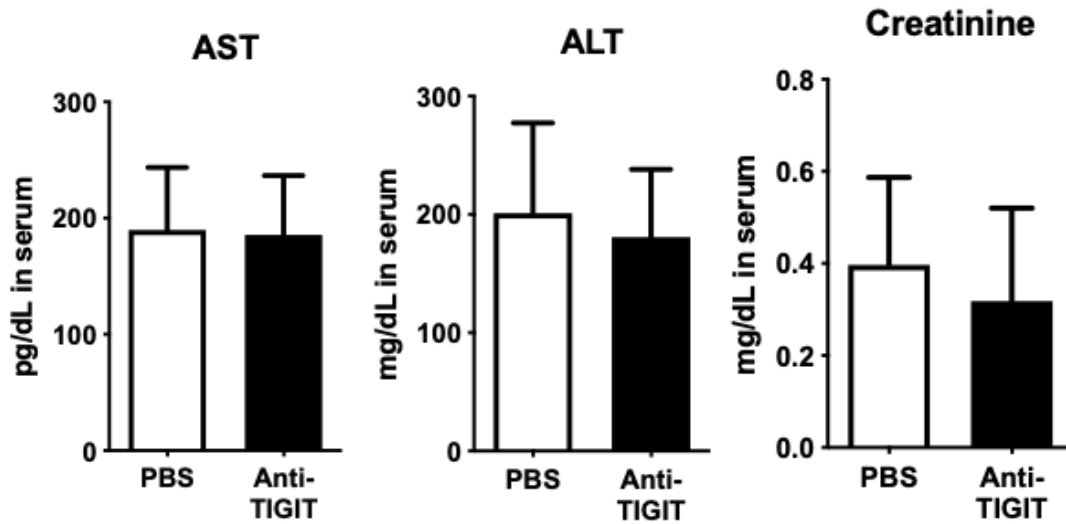

**Figure S2. Anti-TIGIT treatment does not alter serum AST, ALT, or creatinine in cancer septic hosts.** Cancer mice were subjected to CLP and treated with anti-TIGIT mAb or PBS. Serum was collected at 48h post CLP and analyzed for the markers of organ damage shown shown above.

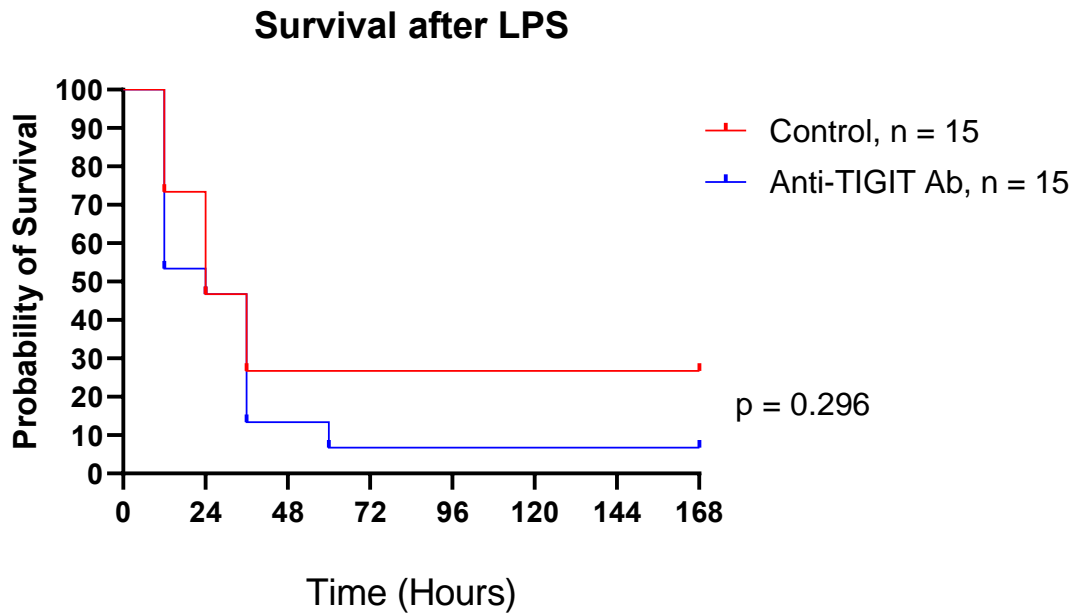

**Figure S3. Anti-TIGIT does not impact mortality of cancer mice in a model of endotoxic shock.** B6 mice were injected with LLC cells and tumors were allowed to develop for 30 days. Mice were injected with 80  $\mu\text{g}$  poly(I:C) and six hours later, received 150  $\mu\text{g}$  of *E. coli* O26:B6 LPS via intraperitoneal injection. Anti-mouse TIGIT monoclonal antibody was injected subcutaneously at a dose of 400  $\mu\text{g}$  per mouse 1h after CLP, and the injection was repeated 12h later. Control animals received PBS injections. Animals were monitored for survival.

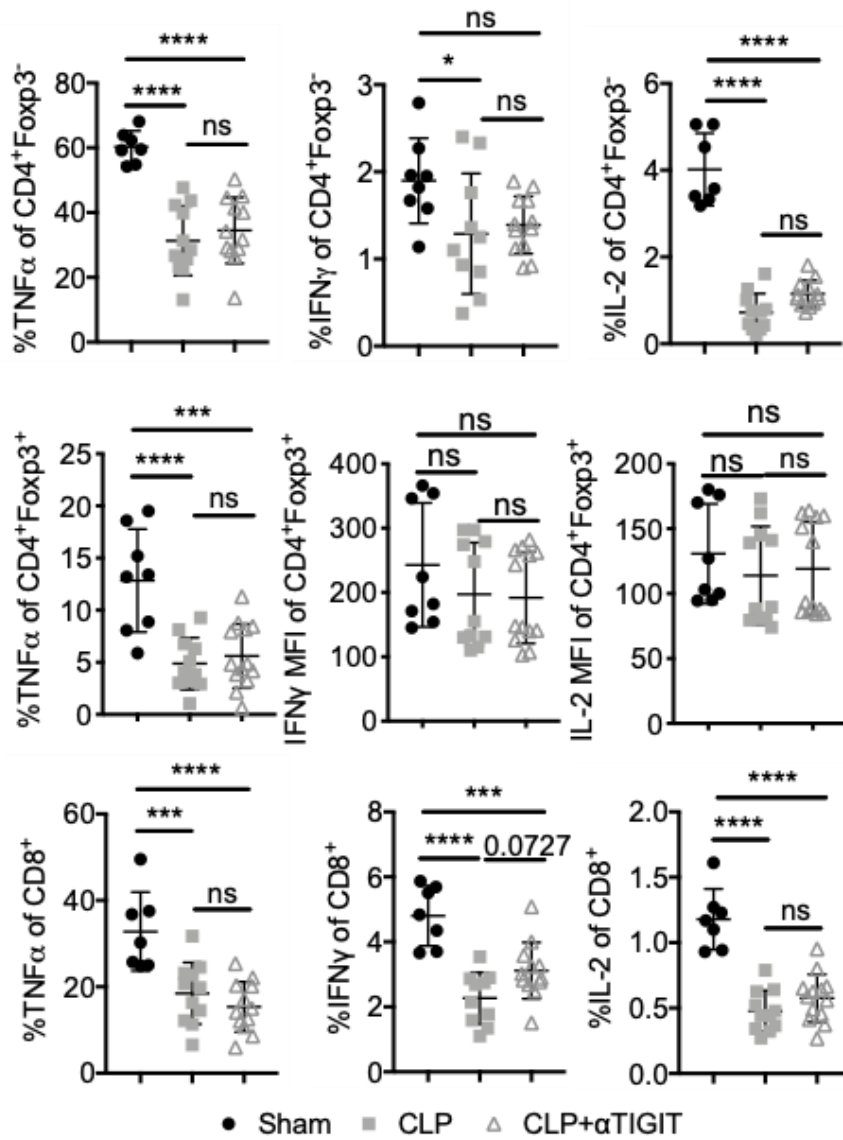

**Figure S4. Anti-TIGIT treatment does not alter cytokine secretion in the CD4<sup>+</sup> and CD8<sup>+</sup> T cells of cancer septic hosts.** Cancer mice were subjected to CLP (or sham surgery) and treated with anti-TIGIT mAb or PBS. Splenocytes from each group were stimulated with PMA and ionomycin at 37 °C for 4 hours. Intracellular staining of TNF, IFN $\gamma$  and IL-2 was performed. Data were pooled from 2 independent experiments. Percentages of TNF<sup>+</sup>, IFN $\gamma$ <sup>+</sup> and IL-2<sup>+</sup> cells are displayed. \*P  $\leq$  0.05, \*\*P  $\leq$  0.01, \*\*\*P  $\leq$  0.001, \*\*\*\*P  $\leq$  0.0001.

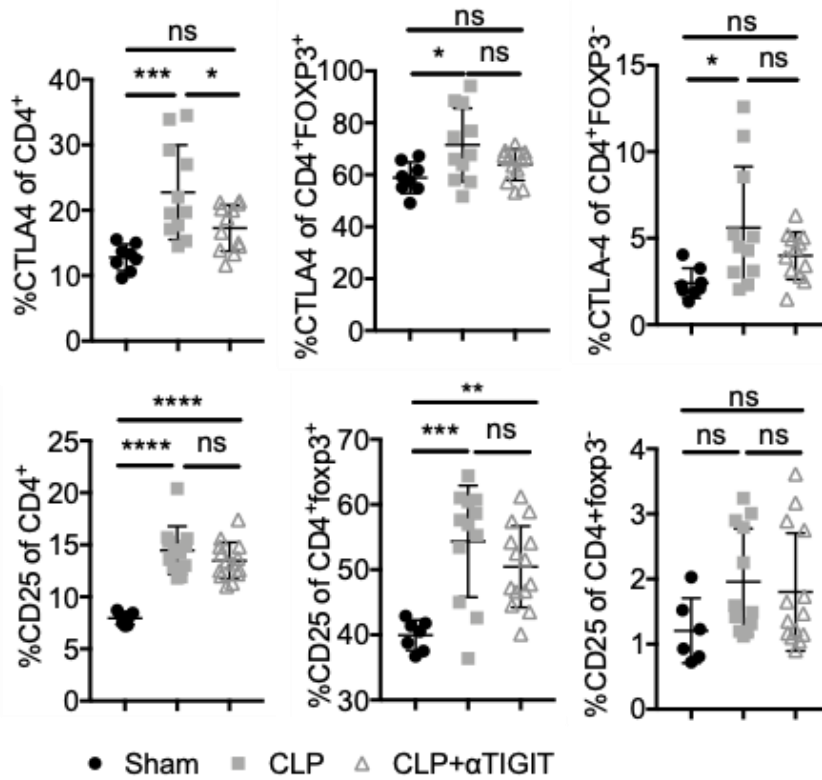

**Figure S5. Anti-TIGIT treatment decreases CTLA-4 expression on bulk CD4<sup>+</sup> T cells in cancer septic mice.** Cancer mice were subjected to CLP (or sham surgery) and treated with anti-TIGIT mAb or PBS. Two days after CLP, mice from each group were sacrificed and spleens were collected for CTLA-4 and CD25 staining. Summary data of CTLA4 and CD25 expression on total CD4<sup>+</sup> T cells, Treg cells and Tconv is displayed. \*P ≤ 0.05, \*\*P ≤ 0.01, \*\*\*P ≤ 0.001, \*\*\*\*P ≤ 0.0001.
